# Supplementary material
Source: publisher figshare collection journal article supplement (https://future-science-group.figshare.com/ndownloader/files/24182528)
Supplement: Supplementary file 1 [file 24182528]

# Supplement

| 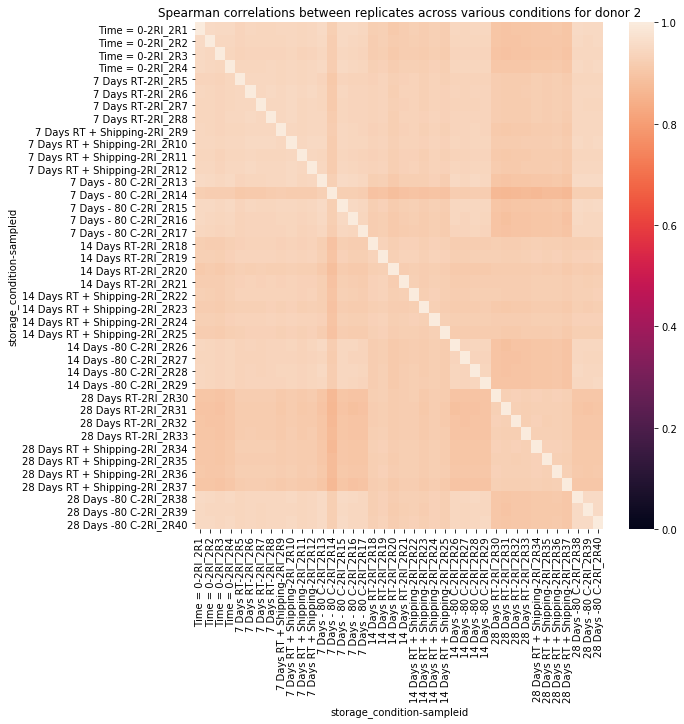 |
| --- |
| 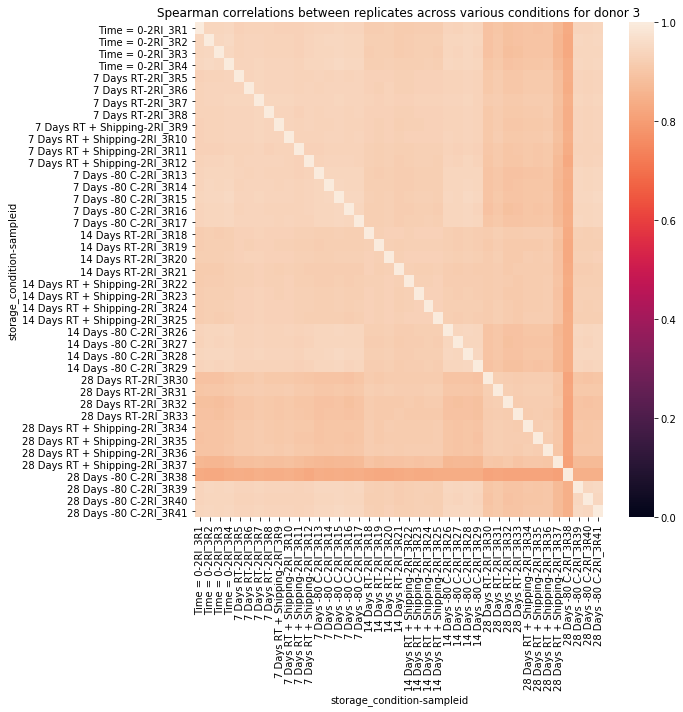 |
| Figure S1. Heatmaps showing Spearman correlation coefficients for sample stability of blood samples stored at ambient temperature and -80oC for 0, 7, 14, and 28 days with and without shipping. The Spearman correlation coefficients for all conditions in all donor samples were greater than 0.81, showing high concordance. Heatmaps for data obtained from donors 2 and 3 are shown here. |
